# Supplementary material
Source: MDPI journal article supplement (https://www.mdpi.com/2073-4395/12/7/1513)
Supplement: s1 [file s1]

Table S1. The names, certification years, and pedigrees of the 79 early-maturing cotton accessions

| Number | Cultivars name | Years | Region                             | Pedigrees                                                                         |
|--------|----------------|-------|------------------------------------|-----------------------------------------------------------------------------------|
| 1      | ICR-CAAS10     | 1980  | Anyang                             | Heishanmian1-derived Lines                                                        |
| 2      | ICR-CAAS14     | 1989  | Anyang                             | 211×Liao6913                                                                      |
| 3      | ICR-CAAS16     | 1990  | Anyang                             | Zhong 211 (ICR-CAAS10-derived Lines) ×Liao4086 (Liaomian7-derived Lines)          |
| 4      | ICR-CAAS18     | 1990  | Anyang                             | (6908×Lambretta GL-5)F <sub>4</sub> × (Heishanmian1×Lambretta GL-5)F <sub>3</sub> |
| 5      | ICR-CAAS24     | 1995  | Anyang                             | Zhong 343× (ICR-CAAS10×USA early maturity cotton B)                               |
| 6      | ICR-CAAS20     | 1996  | Anyang                             | (Shan 2942×Zhong 642) F <sub>1</sub> ×[ (Zhong 607×Liao4086) ×PR80]F <sub>1</sub> |
| 7      | ICR-CAAS26     | 1996  | Anyang                             | 006×ICR-CAAS10                                                                    |
| 8      | ICR-CAAS27     | 1997  | Anyang                             | Zhong 0710×Zhong 5427                                                             |
| 9      | ICR-CAAS35     | 1999  | Anyang                             | Zhong 23021× (ICR-CAAS12×Chuan1704)                                               |
| 10     | ICR-CAAS36     | 1999  | Anyang                             | H109×Zhong 662                                                                    |
| 11     | ICR-CAAS37     | 1999  | Anyang                             | Zhong R114-derived Lines                                                          |
| 12     | ICR-CAAS42     | 2002  | Anyang                             | Zhong 061723×Zhong 916448                                                         |
| 13     | ICR-CAAS50     | 2005  | Anyang                             | H109×C662                                                                         |
| 14     | ICR-CAAS58     | 2006  | Anyang                             | SGK 27×92-047                                                                     |
| 15     | ICR-CAAS64     | 2007  | Anyang                             | SGK 27×Zhong 394                                                                  |
| 16     | Xinluzao1      | 1978  | Northwest Inland Region (Xinjiang) | Xin 722-derived Lines (69-1)                                                      |
| 17     | Xinluzao3      | 1988  | Northwest Inland Region (Xinjiang) | (66-341×USA Glandless Cotton) ×Jingzhou 4588                                      |
| 18     | Xinluzao4      | 1994  | Northwest Inland Region (Xinjiang) | (66-241×74-47W) ×DP 70                                                            |
| 19     | Xinluzao6      | 1997  | Northwest Inland Region (Xinjiang) | 85-174×Bailschlo                                                                  |
| 20     | Xinluzao7      | 1997  | Northwest Inland Region (Xinjiang) | 347-2×Tashkent 2                                                                  |
| 21     | Xinluzao9      | 1999  | Northwest Inland Region (Xinjiang) | (Xinluzao6×Bailschlo) ×ICR-CAAS17                                                 |
| 22     | Xinluzao10     | 1999  | Northwest Inland Region (Xinjiang) | (Heishanmian×02II) ×Zhong 381                                                     |
| 23     | Xinluzao11     | 1999  | Northwest Inland Region (Xinjiang) | Yuzao 202-derived Lines                                                           |
| 24     | Xinluzao12     | 2000  | Northwest Inland Region (Xinjiang) | Liao 95-25-derived Lines                                                          |

|    |              |      |                                    |                                                                         |
|----|--------------|------|------------------------------------|-------------------------------------------------------------------------|
| 25 | Jiumian2     | 2001 | Northwest Inland Region (Gansu)    | 77-118×ICR-CAAS16                                                       |
| 26 | Xinluzao13   | 2002 | Northwest Inland Region (Xinjiang) | 83-14× (Zhong 5601+1639)                                                |
| 27 | Xinluzao20   | 2005 | Northwest Inland Region (Xinjiang) | Xinluzao16-derived Lines                                                |
| 28 | Xinluzao22   | 2005 | Northwest Inland Region (Xinjiang) | 45-1×Xinluzao6                                                          |
| 29 | Xinluzao23   | 2005 | Northwest Inland Region (Xinjiang) | ICR-CAAS27-derived Lines                                                |
| 30 | Xinluzao25   | 2006 | Northwest Inland Region (Xinjiang) | [Xi 5×Bailschlo)×Jin14]F <sub>1</sub> ×ICR-CAAS17                       |
| 31 | Xinluzao26   | 2006 | Northwest Inland Region (Xinjiang) | Xinluzao 8 Variant Plant                                                |
| 32 | Xinluzao27   | 2006 | Northwest Inland Region (Xinjiang) | 7147×Bailschlo                                                          |
| 33 | Xinluzao30   | 2006 | Northwest Inland Region (Xinjiang) | 97-185-derived Lines                                                    |
| 34 | Xinluzao31   | 2006 | Northwest Inland Region (Xinjiang) | (Xinluzao6×Bailschlo) ×Daizimian                                        |
| 35 | Xinluzao32   | 2006 | Northwest Inland Region (Xinjiang) | Takla Makan 77-derived Lines                                            |
| 36 | Xinluzao34   | 2007 | Northwest Inland Region (Xinjiang) | Shi 87 Variant Plant                                                    |
| 37 | Xinluzao35   | 2007 | Northwest Inland Region (Xinjiang) | ((Xinluzao3×Zhong 2621)×Kan 35) ×97-185                                 |
| 38 | Xinluzao36   | 2007 | Northwest Inland Region (Xinjiang) | 1304×BD103                                                              |
| 39 | Xinluzao37   | 2007 | Northwest Inland Region (Xinjiang) | Xi 8×(Liao 9001,Xi 5 and 90-2)                                          |
| 40 | Jiumian3     | 2007 | Northwest Inland Region (Gansu)    | Liaomian16 Variant Plant                                                |
| 41 | Xinluzao39   | 2008 | Northwest Inland Region (Xinjiang) | Xinluzao4×Bailschlo                                                     |
| 42 | Jiumian8     | 2008 | Northwest Inland Region (Gansu)    | Zhong 404×Xinluzao7                                                     |
| 43 | Jiumian9     | 2009 | Northwest Inland Region (Gansu)    | ICR-CAAS 27× (Zhong 65110×Xinluzao7)                                    |
| 44 | Heishanmian1 | 1974 | Liaoh River Basin                  | Jinmian1-derived Lines                                                  |
| 45 | Liaomian5    | 1977 | Liaoh River Basin                  | 614007(Liaomian1×Zhong 1470)×ICR-CAAS3                                  |
| 46 | Liaomian6    | 1981 | Liaoh River Basin                  | [Liaomian3×5998(F <sub>5</sub> )]×[Qiu623×Shu angqing(F <sub>4</sub> )] |

|    |                    |      |                     |                                                                                               |
|----|--------------------|------|---------------------|-----------------------------------------------------------------------------------------------|
| 47 | Liaomian7          | 1983 | Liaohe River Basin  | 2034+Xinlu209+Keke4104+Maste<br>111A+Daizimian16+64-15                                        |
| 48 | Liaomian9          | 1985 | Liaohe River Basin  | Liao661×Hei68-35                                                                              |
| 49 | Liaomian10         | 1990 | Liaohe River Basin  | Shan 3215-derived Lines                                                                       |
| 50 | jnmian3            | 1991 | Liaohe River Basin  | Jin496×Sumian1                                                                                |
| 51 | Liaomian12         | 1994 | Liaohe River Basin  | Liao4228×Liao4082                                                                             |
| 52 | Liaomian15         | 1996 | Liaohe River Basin  | Liao 1038 Variant Plant                                                                       |
| 53 | Liaomian16         | 1999 | Liaohe River Basin  | 4086× (Liaomian6,4696 and 4249)                                                               |
| 54 | Liaomian17         | 2000 | Liaohe River Basin  | 78-4084×82-4258                                                                               |
| 55 | Liaomian18         | 2002 | Liaohe River Basin  | 87-7109×Liao1038-6                                                                            |
| 56 | Liaomian19         | 2003 | Liaohe River Basin  | Liao205×33B                                                                                   |
| 57 | Jinzhong200        | 1961 | YRB (Shanxi)        | O -д1-derived Lines                                                                           |
| 58 | Lumian1            | 1976 | YRB (Shandong)      | ICR-CAAS2×1195                                                                                |
| 59 | Sumian1            | 1988 | YRB (Jiangsu)       | 86-1×[1087-2 (Daihongdai×DP16)<br>×Heishanmian1]                                              |
| 60 | Yumian3            | 1988 | YRB (Henan)         | Shangqiu17×Ke310                                                                              |
| 61 | Yumian5            | 1988 | YRB (Henan)         | ICR-CAAS10× (Heishanmian1×Mianxiang1)                                                         |
| 62 | Lumian10           | 1990 | YRB (Shandong)      | M-100×ICR-CAAS10                                                                              |
| 63 | Yumian7            | 1992 | YRB (Henan)         | ICR-CAAS10× (Aiganzao×B743)<br>F <sub>3</sub>                                                 |
| 64 | Yumian9            | 1993 | YRB (Henan)         | (Kan 5×ICR-CAAS10) F <sub>1</sub> ×ICR-<br>CAAS14                                             |
| 65 | Yumian10           | 1993 | YRB (Henan)         | Shang40×86-1×Ji366                                                                            |
| 66 | Sumian10           | 1995 | YRB (Jiangsu)       | Yanmian 48×20-9                                                                               |
| 67 | Sumian11           | 1997 | YRB (Jiangsu)       | Xiangkan 159×USA CAU'CS-2-81                                                                  |
| 68 | Jinmian23          | 1997 | YRB (Shanxi)        | Lu 331-derived Lines                                                                          |
| 69 | Jinmian26          | 1998 | YRB (Shanxi)        | <i>Bt</i> gene into Jinmian 7                                                                 |
| 70 | Jinmian28          | 1999 | YRB (Shanxi)        | 91-57-derived Lines                                                                           |
| 71 | Jinmian34          | 2002 | YRB (Shanxi)        | VSG×95-1                                                                                      |
| 72 | Jinmian36          | 2003 | YRB (Shanxi)        | Jinmian 19×Yun 148                                                                            |
| 73 | Jinmian44          | 2005 | YRB (Shanxi)        | <i>CryIAc3</i> gene into Ji 492                                                               |
| 74 | Lumianyan27        | 2006 | YRB (Shandong)      | Lu 613×GK12                                                                                   |
| 75 | Lumianyan28        | 2006 | YRB (Shandong)      | (Lumian 14×Shiyuan321) F <sub>1</sub> × (5186,Yumian 19,Zhong 12,Zhong 19,Qinyuan 142,Lu8784) |
| 76 | Kings improved1    | 1890 | United States       | Sugar block cotton                                                                            |
| 77 | Foster cotton6243  | -    | United States       | Foster cotton                                                                                 |
| 78 | Soviet Union91-357 | -    | Former Soviet Union | Former USSR 61                                                                                |
| 79 | Soviet Union10633  | -    | Former Soviet Union | Former USSR                                                                                   |

Table S2. Fingerprinting data for the 79 early-maturing upland cotton accessions

| SN | Cultivar   | NAU<br>4044 | MUSS<br>440 | MON_CGR<br>5565 | GH<br>222 | NAU<br>1190 | BNL<br>1694 |
|----|------------|-------------|-------------|-----------------|-----------|-------------|-------------|
| 1  | ICR-CAAS10 | 10001       | 00101       | 001100          | 001       | 101         | 10          |
| 2  | ICR-CAAS14 | 10001       | 11101       | 001100          | 010       | 101         | 01          |
| 3  | ICR-CAAS16 | 10001       | 11011       | 001100          | 001       | 101         | 01          |
| 4  | ICR-CAAS18 | 10010       | 00101       | 001100          | 001       | 011         | 10          |
| 5  | ICR-CAAS24 | 00101       | 00101       | 101101          | 101       | 101         | 11          |
| 6  | ICR-CAAS20 | 10010       | 00101       | 001100          | 100       | 011         | 10          |
| 7  | ICR-CAAS26 | 10101       | 00101       | 110001          | 001       | 011         | 01          |
| 8  | ICR-CAAS27 | 10001       | 11101       | 001100          | 110       | 111         | 10          |
| 9  | ICR-CAAS35 | 11000       | 11000       | 010001          | 001       | 101         | 10          |
| 10 | ICR-CAAS36 | 10001       | 11101       | 001100          | 101       | 101         | 10          |
| 11 | ICR-CAAS37 | 00100       | 11000       | 001010          | 010       | 101         | 01          |
| 12 | ICR-CAAS42 | 00100       | 00101       | 100001          | 100       | 011         | 10          |
| 13 | ICR-CAAS50 | 10001       | 11000       | 100001          | 100       | 101         | 10          |
| 14 | ICR-CAAS58 | 10100       | 00101       | 100001          | 100       | 011         | 10          |
| 15 | ICR-CAAS64 | 00100       | 00000       | 100001          | 100       | 000         | 10          |
| 16 | Xinluzao1  | 11000       | 00101       | 100001          | 100       | 101         | 01          |
| 17 | Xinluzao3  | 10101       | 00101       | 101101          | 010       | 101         | 01          |
| 18 | Xinluzao4  | 10001       | 00011       | 100001          | 100       | 010         | 01          |
| 19 | Xinluzao6  | 10010       | 11000       | 001100          | 001       | 101         | 01          |
| 20 | Xinluzao7  | 10001       | 11000       | 100001          | 010       | 111         | 01          |
| 21 | Xinluzao9  | 10010       | 00101       | 100001          | 001       | 101         | 01          |
| 22 | Xinluzao10 | 01010       | 11101       | 100001          | 001       | 011         | 01          |
| 23 | Xinluzao11 | 10101       | 11101       | 001110          | 001       | 111         | 11          |
| 24 | Xinluzao12 | 11101       | 00101       | 001110          | 010       | 101         | 11          |
| 25 | Jiumian2   | 10100       | 00101       | 001100          | 101       | 101         | 01          |
| 26 | Xinluzao13 | 10001       | 11000       | 010001          | 001       | 101         | 10          |
| 27 | Xinluzao20 | 11101       | 01111       | 001100          | 110       | 101         | 11          |
| 28 | Xinluzao22 | 11000       | 00101       | 001010          | 100       | 101         | 10          |
| 29 | Xinluzao23 | 10100       | 00101       | 111111          | 001       | 101         | 01          |
| 30 | Xinluzao25 | 11011       | 11011       | 001110          | 101       | 101         | 01          |
| 31 | Xinluzao26 | 00011       | 11011       | 001110          | 001       | 110         | 11          |
| 32 | Xinluzao27 | 10001       | 11000       | 001100          | 001       | 011         | 10          |
| 33 | Xinluzao30 | 10100       | 00101       | 001100          | 100       | 101         | 01          |
| 34 | Xinluzao31 | 10010       | 00101       | 001100          | 001       | 101         | 01          |
| 35 | Xinluzao32 | 01010       | 11000       | 100001          | 001       | 011         | 10          |
| 36 | Xinluzao34 | 01000       | 00011       | 100001          | 001       | 101         | 10          |
| 37 | Xinluzao35 | 00101       | 00101       | 111111          | 001       | 111         | 11          |
| 38 | Xinluzao36 | 10010       | 11000       | 100001          | 010       | 011         | 01          |
| 39 | Xinluzao37 | 00101       | 01111       | 001110          | 001       | 101         | 01          |
| 40 | Jiumian3   | 00100       | 00101       | 001100          | 101       | 101         | 01          |

|    |                    |       |       |        |     |     |    |
|----|--------------------|-------|-------|--------|-----|-----|----|
| 41 | Xinluzao39         | 01000 | 00101 | 010001 | 001 | 011 | 10 |
| 42 | Jiumian8           | 00100 | 11000 | 001100 | 001 | 101 | 01 |
| 43 | Jiumian9           | 10011 | 00101 | 101101 | 100 | 101 | 01 |
| 44 | Heishanmian1       | 10001 | 11000 | 001010 | 001 | 011 | 10 |
| 45 | Liaomian5          | 00001 | 00101 | 100001 | 010 | 011 | 01 |
| 46 | Liaomian6          | 00100 | 00101 | 001010 | 010 | 101 | 01 |
| 47 | Liaomian7          | 00100 | 00101 | 001100 | 100 | 101 | 01 |
| 48 | Liaomian9          | 10101 | 00101 | 001100 | 011 | 101 | 11 |
| 49 | Liaomian10         | 11101 | 00101 | 001100 | 010 | 101 | 10 |
| 50 | Liaojinmian3       | 10100 | 11000 | 001010 | 001 | 101 | 01 |
| 51 | Liaomian12         | 00100 | 00101 | 001100 | 011 | 101 | 01 |
| 52 | Liaomian15         | 10100 | 00011 | 001100 | 001 | -   | 10 |
| 53 | Liaomian16         | 10100 | 00101 | -      | 010 | 101 | 10 |
| 54 | Liaomian17         | 00100 | 01111 | 001100 | 001 | 101 | 01 |
| 55 | Liaomian18         | 10100 | 00011 | 001100 | 010 | 100 | 10 |
| 56 | Liaomian19         | 00100 | 01111 | 101101 | 010 | 010 | 10 |
| 57 | Jinzhong200        | 10001 | 00101 | 100001 | 010 | 101 | 10 |
| 58 | Lumian1            | 10001 | 01111 | 111111 | 001 | 110 | 10 |
| 59 | Sumian1            | 00100 | 00011 | 001010 | 010 | 101 | 10 |
| 60 | Yumian3            | 10100 | 00101 | 111111 | 011 | 011 | 11 |
| 61 | Yumian5            | 11000 | 00101 | 001100 | 001 | 101 | 10 |
| 62 | Lumian10           | 10010 | 00101 | 110001 | 001 | 101 | 01 |
| 63 | Yumian7            | 10100 | 00101 | 001010 | 100 | 101 | 10 |
| 64 | Yumian9            | 10001 | 00101 | 001100 | 001 | 101 | 01 |
| 65 | Yumian10           | 11100 | 00101 | 010001 | 001 | 011 | 01 |
| 66 | Sumian10           | 10101 | 00011 | 001100 | 011 | 010 | 01 |
| 67 | Sumian11           | 11100 | 00101 | 110001 | 001 | 101 | 11 |
| 68 | Jinmian23          | 11111 | 11101 | 111111 | 101 | 101 | 10 |
| 69 | Jinmian26          | 11111 | 11101 | 101101 | 101 | 101 | 01 |
| 70 | Jinmian28          | 10100 | 11101 | 101101 | 011 | 101 | 01 |
| 71 | Jinmian34          | 10100 | 00101 | 100001 | 001 | 101 | 01 |
| 72 | Jinmian36          | 11000 | 00011 | 010001 | 010 | 010 | 01 |
| 73 | Jinmian44          | 00100 | 00011 | 100001 | 001 | 010 | 01 |
| 74 | Lumianyan27        | 10100 | 00011 | -      | 001 | 010 | 01 |
| 75 | Lumianyan28        | 01100 | 01111 | 110001 | 010 | 010 | 01 |
| 76 | Kings improved1    | 10001 | 00101 | 001100 | 001 | 011 | 10 |
| 77 | Foster cotton6243  | 10100 | 00101 | 001100 | 001 | 101 | 10 |
| 78 | Soviet Union91-357 | 00011 | 00101 | 001100 | 011 | 110 | 10 |
| 79 | Soviet Union10633  | 10100 | 00011 | 001100 | 001 | 100 | 01 |
